# Supplementary material
Source: PubMed Central journal article supplement (PMC7433760)
Supplement: NIHMS1604812-supplement-1.pdf [file NIHMS1604812-supplement-1.pdf]

**Cell Reports, Volume 31**

**Supplemental Information**

**Combinatorial Developmental Controls  
on Striatonigral Circuits**

**Ayano Matsushima and Ann M. Graybiel**

Table S1. P values of post-hoc comparisons applied for data shown in Figures 2B, 2D, 3B, 3D, and 3F, related to Figures 2 and 3. Top tables show the comparisons between groups of data per cell, whereas bottom tables show those of data per mouse.

| <b>Datum/cell</b> | Figure 2B | Figure 2D | Figure 3B |
|-------------------|-----------|-----------|-----------|
| E11 vs. E12       | 0.8324    | 0.0229    | 0.6854    |
| E11 vs. E13       | 0.0002    | 0.0000    | 0.0000    |
| E11 vs. E14       | 0.0000    | 0.0000    | 0.0000    |
| E12 vs. E13       | 0.0000    | 0.0000    | 0.0000    |
| E12 vs. E14       | 0.0000    | 0.0000    | 0.0000    |
| E13 vs. E14       | 0.0000    | 0.0000    | 0.0000    |

| <b>Datum/cell</b> | Figure 3D | Figure 3F |
|-------------------|-----------|-----------|
| E10 vs. E11       | 0.0015    | 0.9908    |
| E10 vs. E12       | 0.0000    | 0.0129    |
| E10 vs. E13       | 0.0000    | 0.0000    |
| E10 vs. E14       | 0.0000    | 0.0000    |
| E11 vs. E12       | 0.0000    | 0.0000    |
| E11 vs. E13       | 0.0000    | 0.0000    |
| E11 vs. E14       | 0.0000    | 0.0000    |
| E12 vs. E13       | 0.0014    | 0.0000    |
| E12 vs. E14       | 0.0000    | 0.0000    |
| E13 vs. E14       | 0.0001    | 0.0000    |

| <b>Datum/mouse</b> | Figure 2B | Figure 2D | Figure 3B |
|--------------------|-----------|-----------|-----------|
| E11 vs. E12        | 0.9544    | 0.9705    | 0.8798    |
| E11 vs. E13        | 0.7691    | 0.1598    | 0.1364    |
| E11 vs. E14        | 0.0562    | 0.0098    | 0.0046    |
| E12 vs. E13        | 0.4464    | 0.3595    | 0.4924    |
| E12 vs. E14        | 0.0125    | 0.0377    | 0.0461    |
| E13 vs. E14        | 0.4020    | 0.7261    | 0.6343    |

| <b>Datum/mouse</b> | Figure 3D | Figure 3F |
|--------------------|-----------|-----------|
| E10 vs. E11        | 0.8643    | 0.9988    |
| E10 vs. E12        | 0.2826    | 0.6051    |
| E10 vs. E13        | 0.0604    | 0.1249    |
| E10 vs. E14        | 0.0072    | 0.0087    |
| E11 vs. E12        | 0.8276    | 0.7179    |
| E11 vs. E13        | 0.4031    | 0.1574    |
| E11 vs. E14        | 0.1044    | 0.0096    |
| E12 vs. E13        | 0.9673    | 0.8531    |
| E12 vs. E14        | 0.6952    | 0.2608    |
| E13 vs. E14        | 0.9673    | 0.8531    |
